# Supplementary material for: In silico design of miniprotein to inhibit SARS-CoV-2 variant Omicron spike protein
Source: Royal Society of Chemistry journal article supplement (doi:10.1039/d3cp01167d), 2023-01-01
Supplement: d3cp01167d1.pdf [file d3cp01167d1.pdf]

# Supporting Information

## *In Silico* Design of Miniprotein to Inhibit SARS-CoV-2 Variant Omicron Spike Protein

Jianhua Wu,<sup>†</sup> Hong-Xing Zhang<sup>†,\*</sup> and Jilong Zhang,<sup>†,\*</sup>

<sup>†</sup> Institute of Theoretical Chemistry, College of Chemistry, Jilin University, Changchun 130023,  
Jilin, People's Republic of China.

\*Emails: [zhanghx@jlu.edu.cn](mailto:zhanghx@jlu.edu.cn); [jilongzhang@jlu.edu.cn](mailto:jilongzhang@jlu.edu.cn)

### Methods

#### Principal Component Analysis

Principal component analysis (PCA)<sup>1, 2</sup> is a statistical technique for extracting essential information from MD trajectories and is often applied to reduce the dimensionality of data describing protein motion. The observed protein motion is filtered from the largest to the smallest spatial scale by a decomposition process. The translational and rotational motion of all C $\alpha$  atoms was removed by fitting each frame in the MD simulation trajectories to the mean structure. The 'covar' module of GROMACS was performed to construct a covariance matrix of the C $\alpha$  atomic positions of the complex MD simulation trajectories. The covariance matrix,  $C_{ij}$ , is represented by the following equation

$$C_{ij} = \langle (r_i - \langle r_i \rangle) \times (r_j - \langle r_j \rangle) \rangle \quad (i, j = 1, 2, 3, \dots, N)$$

where  $r_i$  and  $r_j$  are the Cartesian coordinates of the  $i$ -th and  $j$ -th C $\alpha$  atoms. The eigenvectors and the corresponding eigenvalues are obtained by diagonalizing the covariance matrix based on the C $\alpha$  atomic fluctuations. The eigenvectors and eigenvalues represent the direction and amplitude of the protein motion, respectively. The eigenvectors were assessed by the 'anaeig' module. The eigenvectors were sorted in descending order according to the eigenvalues, and the eigenvector with the highest eigenvalue, namely, the first principal component (PC1), which is mainly responsible for describing the most important motion of the protein, was used to draw porcupine plots in this

work, to elucidate the RBD<sup>O</sup> protein's dominant global motility changes induced by inhibitor binding.

## Binding Free Energy Calculation

The binding free energy is an essential indicator for assessing the binding strength of receptors to ligands. The `g_mmpbsa` tool<sup>3</sup> in the scripts-based APBS program was performed to calculate the binding free energy using the molecular mechanics/Poisson–Boltzmann surface area (MM/PBSA) method,<sup>4-6</sup> which is a popular approach for providing detailed information on the interaction between receptor and ligand. 6000 frames were extracted from MD trajectories with stable conformations to predict the binding free energy between RBD<sup>O</sup> protein and ACE2 or inhibitors according to the following equation

$$\Delta G_{bind} = \Delta G_{complex} - (\Delta G_{receptor} + \Delta G_{ligand})$$

here  $\Delta G_{complex}$ ,  $\Delta G_{receptor}$ , and  $\Delta G_{ligand}$  refer to the free energy of complex, RBD<sup>O</sup>, ACE2 or inhibitors, respectively.  $\Delta G_{bind}$  can be decomposed into different forms of interactions and is written as

$$\Delta G_{bind} = \Delta E_{MM} + \Delta G_{sol} - T\Delta S$$

$$\Delta E_{MM} = \Delta E_{vdW} + \Delta E_{ele} + \Delta E_{int}$$

where  $\Delta G_{bind}$  consists of the gas-phase molecular mechanics energy ( $\Delta E_{MM}$ ), solvation free energy ( $\Delta G_{sol}$ ), and conformational entropy upon ligand binding ( $-T\Delta S$ ). Because the goal of the calculation is to obtain the relative free energy and not the absolute value, the entropy with the large computational cost and low prediction accuracy was not considered in the free energy calculation. The  $\Delta E_{MM}$  can be divided into three terms: van der Waals contribution ( $\Delta E_{vdW}$ ), electrostatic contribution ( $\Delta E_{ele}$ ), and internal energy contribution ( $\Delta E_{int}$ , sum of the energies of bond, angle, and dihedral). Because the single trajectory strategy was applied between complex, receptor, and ligand, the  $\Delta E_{int}$  term was completely canceled. The  $\Delta G_{sol}$  can be broken down into polar ( $\Delta G_{PB}$ ) and nonpolar ( $\Delta G_{SA}$ ) energies.

$$\Delta G_{sol} = \Delta G_{PB} + \Delta G_{SA}$$

$$\Delta G_{SA} = \gamma \cdot SASA + \beta$$

in which the  $\Delta G_{PB}$  was computed by using the Poisson–Boltzmann (PB) model with the solute and solvent dielectric constants of 1.0 and 80.0, respectively, and  $\Delta G_{SA}$  was estimated from solvent

accessible surface area (SASA) model with the parameters  $\gamma$  and  $\beta$  of  $0.00542 \text{ kcal mol}^{-1}\text{\AA}^{-2}$  and  $0.92 \text{ kcal mol}^{-1}$ , respectively.

**Table S1.** Alanine mutation energy and effect of mutation based on inhibitor AHB2 (kcal/mol). Residues are sorted from high to low according to mutation energy and effect.

| Mutation  | Energy<br>$\gamma$ | Effect of Mutation | Mutation  | Energy<br>$\gamma$ | Effect of Mutation |
|-----------|--------------------|--------------------|-----------|--------------------|--------------------|
| HIS18→ALA | 2.48               | DESTABILIZIN<br>G  | LEU69→ALA | 0.05               | NEUTRAL            |
| ASP11→ALA | 2.16               | DESTABILIZIN<br>G  | LEU16→ALA | 0.04               | NEUTRAL            |
| LEU44→ALA | 1.45               | DESTABILIZIN<br>G  | LEU20→ALA | 0.04               | NEUTRAL            |
| GLU41→ALA | 1.34               | DESTABILIZIN<br>G  | ILE55→ALA | 0.04               | NEUTRAL            |
| TRP37→ALA | 1.29               | DESTABILIZIN<br>G  | VAL13→ALA | 0.03               | NEUTRAL            |
| LEU21→ALA | 1.13               | DESTABILIZIN<br>G  | SER14→ALA | 0.03               | NEUTRAL            |
| ASN36→ALA | 0.97               | DESTABILIZIN<br>G  | LEU46→ALA | 0.03               | NEUTRAL            |
| GLU3→ALA  | 0.94               | DESTABILIZIN<br>G  | ILE58→ALA | 0.03               | NEUTRAL            |
| GLU45→ALA | 0.90               | DESTABILIZIN<br>G  | ILE65→ALA | 0.03               | NEUTRAL            |
| GLU30→ALA | 0.88               | DESTABILIZIN<br>G  | VAL6→ALA  | 0.02               | NEUTRAL            |
| GLU15→ALA | 0.81               | DESTABILIZIN<br>G  | GLN12→ALA | 0.02               | NEUTRAL            |
| GLU19→ALA | 0.71               | DESTABILIZIN<br>G  | VAL9→ALA  | 0.01               | NEUTRAL            |
| GLU54→ALA | 0.71               | DESTABILIZIN<br>G  | LEU66→ALA | 0.01               | NEUTRAL            |
| GLU4→ALA  | 0.68               | DESTABILIZIN<br>G  | LEU72→ALA | 0.01               | NEUTRAL            |
| GLU61→ALA | 0.67               | DESTABILIZIN<br>G  | ALA17→ALA | 0.00               | NEUTRAL            |
| ASP50→ALA | 0.66               | DESTABILIZIN<br>G  | ALA33→ALA | 0.00               | NEUTRAL            |
| MET7→ALA  | 0.65               | DESTABILIZIN<br>G  | ALA62→ALA | 0.00               | NEUTRAL            |
| MET43→ALA | 0.64               | DESTABILIZIN       | ALA73→ALA | 0.00               | NEUTRAL            |

|           |      |                   |           |       |             |
|-----------|------|-------------------|-----------|-------|-------------|
| GLU59→ALA | 0.64 | G<br>DESTABILIZIN | ALA32→ALA | -0.01 | NEUTRAL     |
| HIS22→ALA | 0.59 | G<br>DESTABILIZIN | ALA39→ALA | -0.01 | NEUTRAL     |
| ASP51→ALA | 0.58 | G<br>DESTABILIZIN | SER49→ALA | -0.01 | NEUTRAL     |
| GLU57→ALA | 0.58 | G<br>DESTABILIZIN | MET42→ALA | -0.02 | NEUTRAL     |
| GLU27→ALA | 0.56 | G<br>DESTABILIZIN | PHE35→ALA | -0.03 | NEUTRAL     |
| GLU52→ALA | 0.54 | G<br>DESTABILIZIN | LEU24→ALA | -0.04 | NEUTRAL     |
| GLU60→ALA | 0.53 | G<br>DESTABILIZIN | THR25→ALA | -0.07 | NEUTRAL     |
| GLU70→ALA | 0.53 | G<br>DESTABILIZIN | GLY26→ALA | -0.16 | NEUTRAL     |
| GLU1→ALA  | 0.52 | G<br>DESTABILIZIN | ARG31→ALA | -0.43 | NEUTRAL     |
| GLU67→ALA | 0.49 | G<br>NEUTRAL      | LYS75→ALA | -0.43 | NEUTRAL     |
| GLU71→ALA | 0.47 | G<br>NEUTRAL      | ARG74→ALA | -0.46 | NEUTRAL     |
| GLU28→ALA | 0.42 | G<br>NEUTRAL      | LYS23→ALA | -0.48 | NEUTRAL     |
| LEU29→ALA | 0.39 | G<br>NEUTRAL      | ARG53→ALA | -0.48 | NEUTRAL     |
| ILE47→ALA | 0.37 | G<br>NEUTRAL      | HIS68→ALA | -0.55 | STABILIZING |
| THR40→ALA | 0.22 | G<br>NEUTRAL      | ARG56→ALA | -0.57 | STABILIZING |
| TYR34→ALA | 0.21 | G<br>NEUTRAL      | ARG64→ALA | -0.57 | STABILIZING |
| LEU2→ALA  | 0.19 | G<br>NEUTRAL      | ARG63→ALA | -0.61 | STABILIZING |
| LEU10→ALA | 0.10 | G<br>NEUTRAL      | LYS48→ALA | -0.68 | STABILIZING |
| GLN5→ALA  | 0.08 | G<br>NEUTRAL      | HIS8→ALA  | -0.70 | STABILIZING |
| TRP38→ALA | 0.06 | G<br>NEUTRAL      |           |       |             |

**Table S2.** Mutation energy of single mutation based on the inhibitor AHB2 (kcal/mol). The values of favorable residue mutation energy are bolded.

|     | E3    | E4           | M7           | D11  | E15  | H18                          | E19  | L21          | E30          | N36          | W37                      | E41          | M43          | L44          | E45          | D50   | E54  | E59  | E61  |
|-----|-------|--------------|--------------|------|------|------------------------------|------|--------------|--------------|--------------|--------------------------|--------------|--------------|--------------|--------------|-------|------|------|------|
| ALA | 0.94  | 0.68         | 0.65         | 2.16 | 0.81 | 2.48                         | 0.71 | 1.13         | 0.88         | 0.97         | 1.29                     | 1.34         | 0.64         | 1.45         | 0.90         | 0.66  | 0.71 | 0.64 | 0.67 |
| ARG | 1.46  | 0.61         | 0.62         | 2.86 | 1.42 | 1.8                          | 1.34 | 0.04         | 0.74         | <b>-1.69</b> | 1.56                     | 1.57         | 0.45         | 1.89         | 1.76         | 1.32  | 1.48 | 1.24 | 1.37 |
| ASN | 0.67  | 0.68         | 0.18         | 2.13 | 0.76 | 2.00                         | 0.74 | 0.29         | 0.48         | 0.00         | 0.49                     | 0.54         | 0.44         | 1.18         | 0.87         | 0.68  | 0.74 | 0.61 | 0.68 |
| ASP | -0.15 | <b>-0.65</b> | <b>-1.00</b> | 0.03 | 0.04 | 2.31                         | 0.19 | 0.49         | -0.09        | -0.34        | <b>-0.6</b>              | -0.20        | -0.50        | 0.23         | 0.03         | 0.09  | 0.03 | 0.00 | 0.04 |
| CYS | 0.84  | 0.60         | 0.59         | 1.86 | 0.76 | 2.35                         | 0.67 | 1.04         | 0.73         | 0.62         | 1.01                     | 1.37         | 0.55         | 1.27         | <b>0.93</b>  | 0.71  | 0.72 | 0.64 | 0.67 |
| GLN | 0.67  | 0.74         | -0.14        | 2.18 | 0.78 | Mutation<br>E4D/W/Y<br>0.88  | 0.56 | -0.27        | 0.72         | <b>-0.81</b> | Mutation Energy<br>-1.22 | 0.91         | -0.15        | 0.64         | <b>0.84</b>  | 0.70  | 0.70 | 0.63 | 0.66 |
| GLU | 0.00  | -0.2         | <b>-1.48</b> | 1.29 | 0.05 | M7E+E30W<br>1.82             | 0.28 | 0.06         | -1.77        | -2.54        | 2.45                     | 0.40         | 0.03         | <b>-1.00</b> | -0.28        | -0.05 | 0.06 | 0.02 | 0.00 |
| GLY | 1.09  | 0.77         | 1.05         | 2.32 | 0.87 | M7E+L21W<br>0.84             | 0.75 | 1.43         | -2.15        | 1.41         | 1.85                     | 1.44         | 0.83         | 1.92         | 0.84         | 0.72  | 0.71 | 0.64 | 0.67 |
| HIS | 1.65  | -0.29        | <b>-0.59</b> | 1.15 | 0.41 | M7E+E30W<br>0.49             | 0.84 | -0.07        | -2.12        | -0.38        | -0.33                    | 0.24         | <b>-1.48</b> | -0.30        | 0.74         | 0.71  | 0.80 | 0.61 | 0.61 |
| ILE | 0.61  | 0.23         | 0.08         | 1.59 | 0.35 | M7E+N36R/Q/E/L/K/W/Y<br>0.81 | 0.09 | -0.09        | -2.63        | -1.67        | 2.58                     | 2.03         | -2.08        | 0.61         | <b>-1.89</b> | 0.88  | 0.70 | 0.71 | 0.62 |
| LEU | 0.48  | 0.02         | -0.47        | 1.69 | 0.53 | M7E+W37D<br>0.82             | 0.66 | -0.01        | -2.04        | <b>-0.72</b> | 0.65                     | 1.03         | -0.07        | -0.07        | 0.86         | 0.74  | 0.70 | 0.61 | 0.65 |
| LYS | 1.46  | 1.56         | 0.70         | 3.29 | 0.63 | M7E+M43E/H/W/Y<br>0.82       | 1.35 | 0.59         | -2.89        | -3.2         | <b>3.44</b>              | <b>-1.33</b> | 1.87         | 0.90         | 1.70         | 1.58  | 1.33 | 1.38 | 1.29 |
| MET | 1.04  | 0.32         | -0.04        | 2.03 | 0.64 | M7E+L44W/Y<br>1.25           | 0.84 | -0.15        | -3.14        | -2.7         | 0.35                     | 1.17         | 0.55         | -0.08        | 0.38         | 0.78  | 0.71 | 0.72 | 0.62 |
| PHE | 0.81  | -0.08        | <b>-1.44</b> | 1.44 | 0.13 | 0.94                         | 0.83 | -0.26        | -0.14        | -0.16        | -0.4                     | 0.94         | -0.26        | 0.06         | 0.62         | 0.62  | 0.77 | 0.61 | 0.62 |
| PRO | 0.86  | 0.42         | 0.44         | 1.84 | 0.46 | 1.94                         | 0.49 | 0.80         | 0.20         | 0.72         | 0.62                     | 0.65         | 0.37         | 0.86         | 0.64         | 0.66  | 0.71 | 0.60 | 0.64 |
| SER | 0.93  | 0.90         | 0.92         | 2.23 | 0.79 | 2.80                         | 0.67 | 1.21         | 1.40         | 0.87         | 2.42                     | 1.24         | 0.65         | 1.92         | 0.88         | 0.69  | 0.72 | 0.63 | 0.68 |
| THR | 0.81  | 0.87         | 0.31         | 1.95 | 0.69 | 2.28                         | 0.61 | 0.71         | 1.31         | 0.26         | 2.13                     | 1.16         | 0.46         | 1.26         | 0.90         | 0.70  | 0.73 | 0.61 | 0.67 |
| TRP | 1.09  | <b>-1.24</b> | <b>-1.12</b> | 0.59 | 0.04 | 0.55                         | 0.61 | <b>-0.87</b> | <b>-0.63</b> | <b>-0.58</b> | 0.05                     | 1.07         | <b>-1.63</b> | <b>-1.38</b> | 0.84         | 0.57  | 0.72 | 0.52 | 0.61 |
| TYR | -0.01 | <b>-0.6</b>  | -0.08        | 1.53 | 0.08 | -0.04                        | 0.69 | -0.11        | -0.14        | <b>-1.07</b> | 0.75                     | 1.14         | <b>-0.54</b> | <b>-1.18</b> | 0.66         | 0.57  | 0.77 | 0.62 | 0.64 |
| VAL | 0.70  | 0.36         | 0.92         | 1.82 | 0.62 | 1.89                         | 0.85 | 0.59         | 0.70         | 0.28         | 0.26                     | 0.86         | 0.33         | 0.72         | 0.89         | 0.71  | 0.71 | 0.62 | 0.66 |

**Table S3.** Mutational energy of M7E-based double point mutation based on the inhibitor AHB2 (kcal/mol).

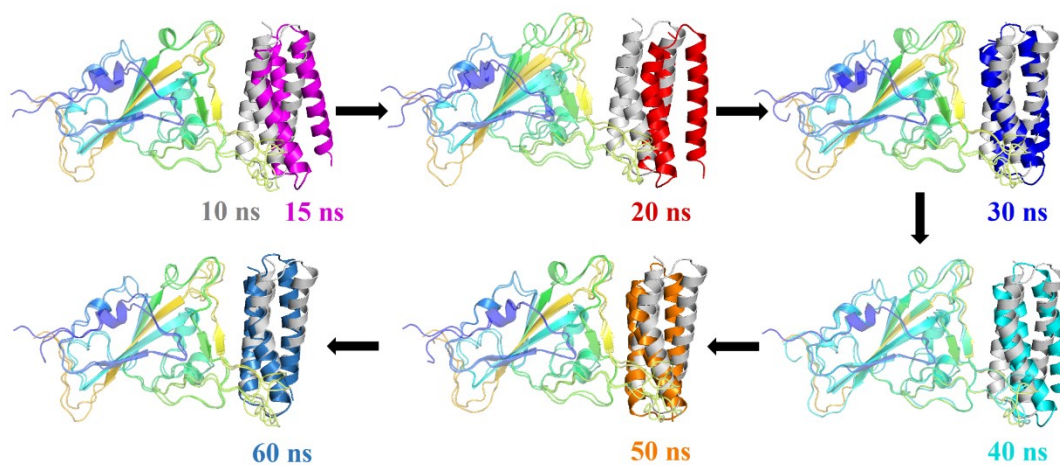

**Fig S1.** Superimposed 3D structures of the inhibitor M7E+M43Y with its the structure (t = 10 ns) at different MD simulation periods (t = 15, 20, 30, 40, 50, 60 ns). The triple helix inhibitor is represented by different colors at different MD simulation times, and the RBD<sup>O</sup> region is represented as transparent.

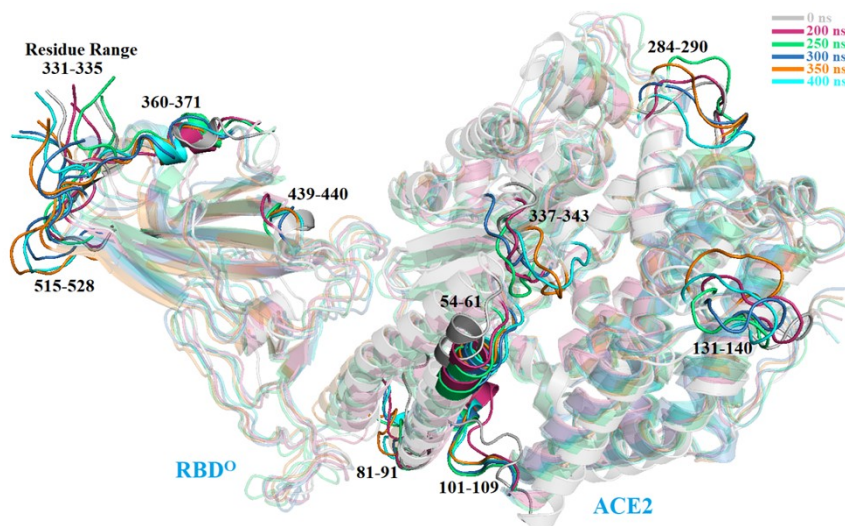

**Fig S2.** Superimposed 3D structures of the RBD<sup>O</sup>-ACE2 complex (Run\_1 MD simulation) with its initial structure (t = 0 ns) at different MD simulation periods (t = 200, 250, 300, 350, and 400 ns). Regions with large RMSD fluctuations are represented as solids, while other regions are represented as transparent.

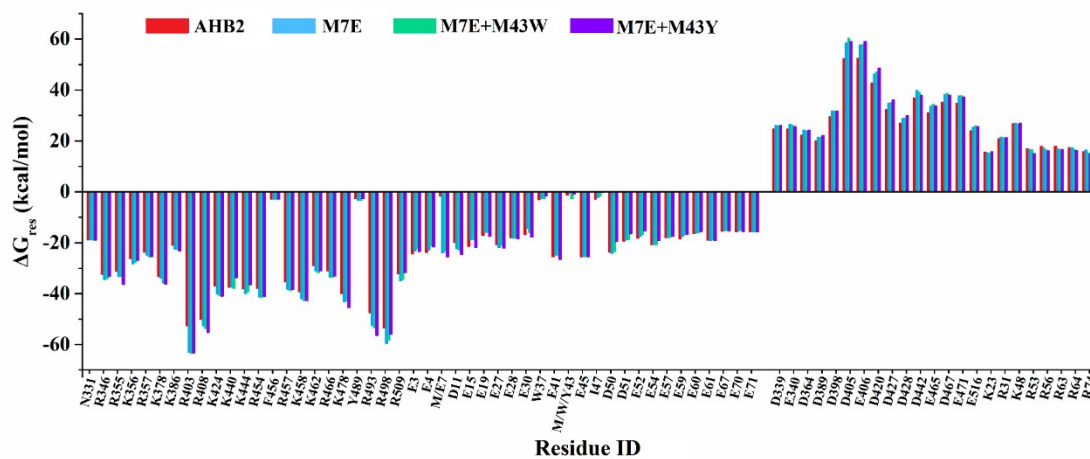

**Fig S3.** Residue-based energy decomposition on critical residues for AHB2 (red), M7E (blue), M7E+M43W (green), and M7E+M43W (violet) systems.  $\Delta G_{res} < -2.0$  kcal/mol and  $\Delta G_{res} > 2.0$  kcal/mol are considered as crucial residues.

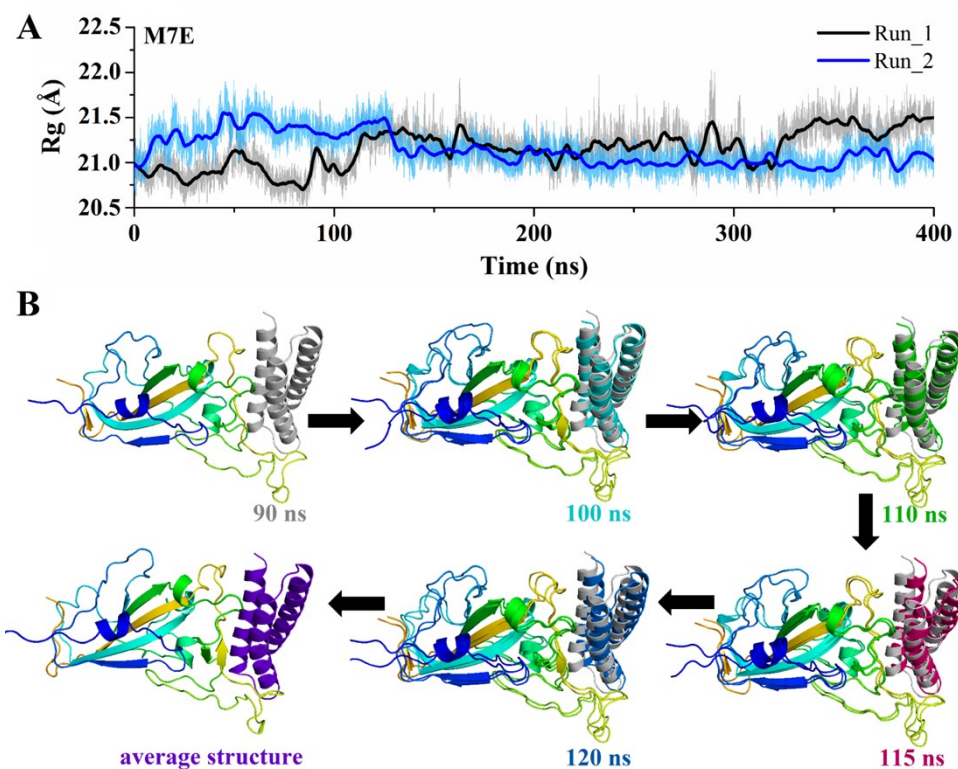

**Fig S4.** (A) R<sub>g</sub> plot of the M7E complex for two parallel MD simulations. The transparent curves are the R<sub>g</sub> value fluctuations and the smooth solid curves represent the average R<sub>g</sub> value. The average R<sub>g</sub> curves were plotted by the Savitzky–Golay method with the adjacent 1000 data points. (B) Superimposed 3D structures of the M7E complex with its the structure (t = 90 ns) at different MD simulation periods (t = 100, 110, 115, and 120 ns). The triple helix inhibitor is represented by different colors at different MD simulation times.



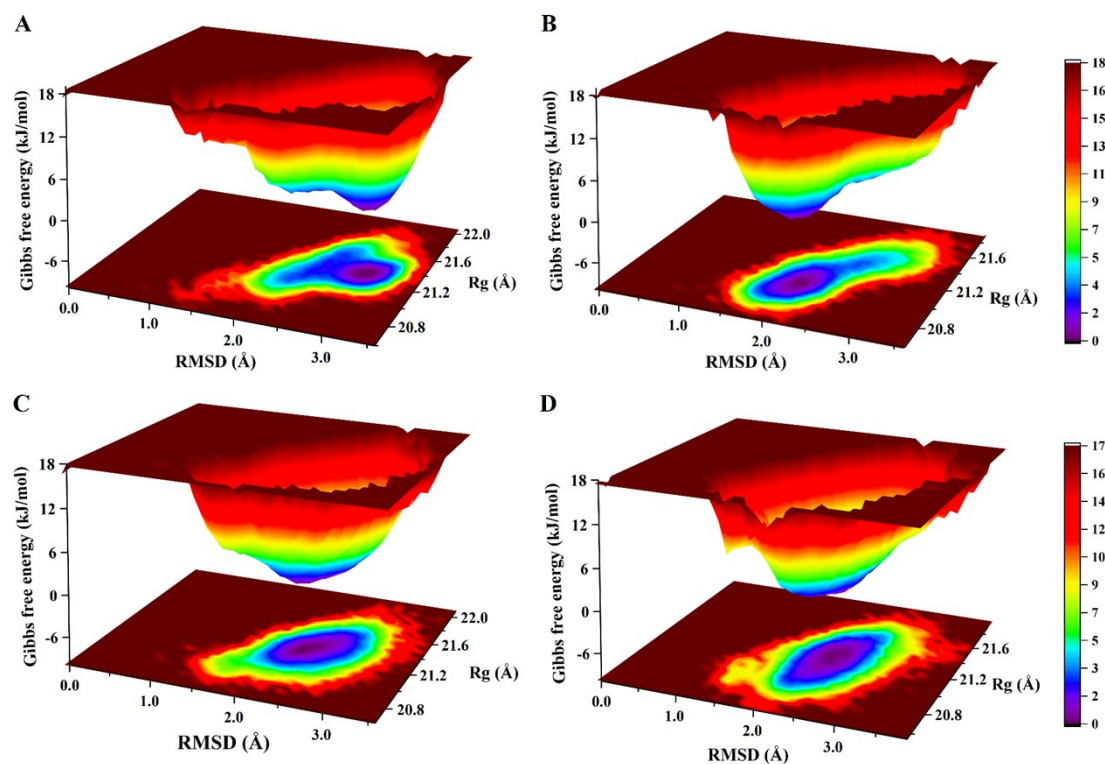

**Figure S5.** Free energy landscapes of (A) AHB2, (B) M7E, (C) M7E+M43W, and (D) M7E+M43Y complexes during replica MD simulation.

## References

- Amadei, A.; Linssen, A. B.; Berendsen, H. J., Essential dynamics of proteins. *Proteins* **1993**, 17 (4), 412–425.
- Sun, H.; Li, Y.; Li, D.; Hou, T., Insight into Crizotinib Resistance Mechanisms Caused by Three Mutations in ALK Tyrosine Kinase using Free Energy Calculation Approaches. *J. Chem. Inf. Model.* **2013**, 53 (9), 2376–2389.
- Kumari, R.; Kumar, R.; Lynn, A.; Open Source Drug Discovery, C., g\_mmpbsa-A GROMACS Tool for High-Throughput MM-PBSA Calculations. *J. Chem. Inf. Model.* **2014**, 54 (7), 1951–1962.
- Genheden, S.; Ryde, U., The MM/PBSA and MM/GBSA methods to estimate ligand-binding affinities. *Expert Opin. Drug Discov.* **2015**, 10 (5), 449–461.
- Sun, H.; Li, Y.; Shen, M.; Tian, S.; Xu, L.; Pan, P.; Guan, Y.; Hou, T., Assessing the performance of MM/PBSA and MM/GBSA methods. 5. Improved docking performance using high solute dielectric constant MM/GBSA and MM/PBSA rescoring. *Phys. Chem. Chem. Phys.* **2014**, 16 (40), 22035–22045.
- Wang, E.; Weng, G.; Sun, H.; Du, H.; Zhu, F.; Chen, F.; Wang, Z.; Hou, T., Assessing the performance of the MM/PBSA and MM/GBSA methods. 10. Impacts of enhanced sampling and variable dielectric model on protein-protein Interactions. *Phys. Chem. Chem. Phys.* **2019**, 21 (35), 18958–18969.
